# Supplementary material for: The Impact of Tree Species on Microbial Community Structure and Soil Function on Forest Plantations in the Central Hardwoods Region (CHR)
Source: MDPI journal article supplement (doi:10.3390/f14050859), 2023-04-22
Supplement: s1 [file s1]

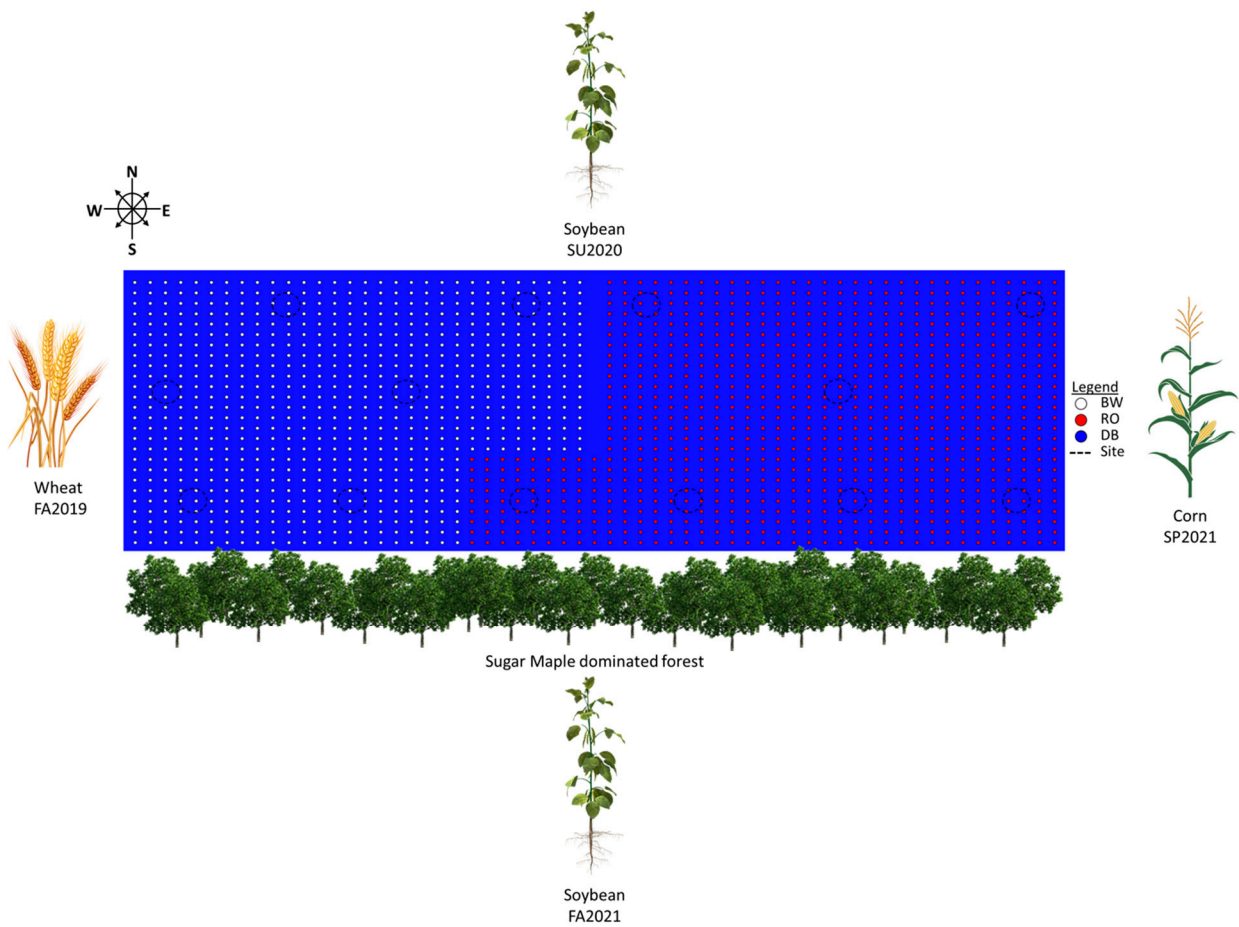

**Figure S1.** Black walnut and red oak forest plantation research site in Lower Michigan.

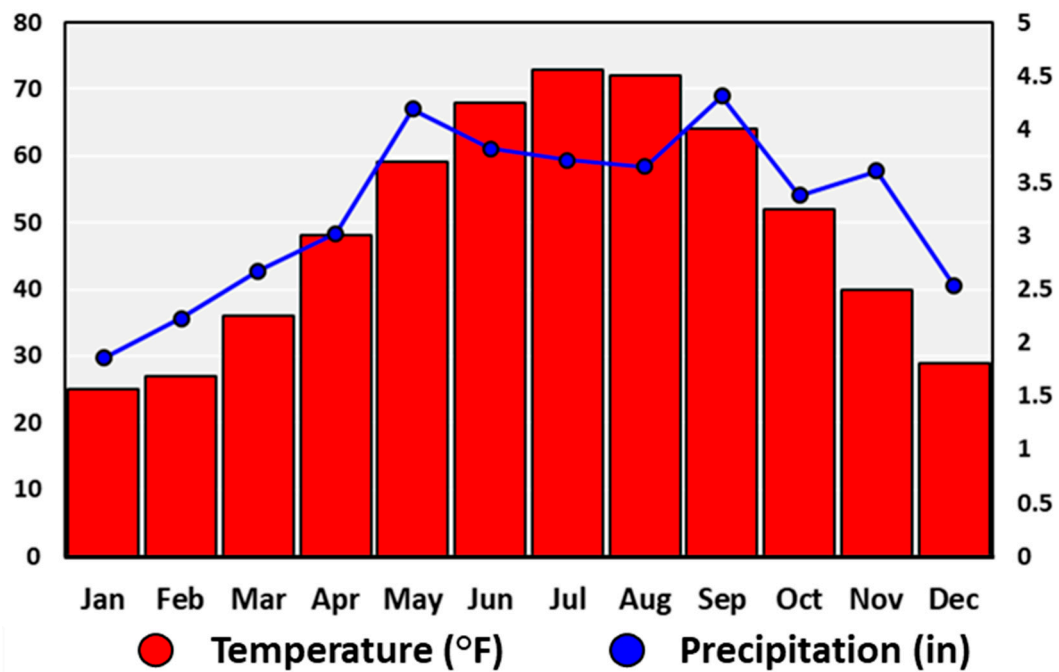

**Figure S2.** Annual temperatures and precipitation in Lower Michigan.
